# Supplementary material for: Vanadyl complexes bearing bi- and triphenolate chelate ligands: highly active ethylene polymerisation procatalystsElectronic supplementary information (ESI) available: selected spectroscopic and polymerisation data. See http://www.rsc.org/suppdata/cc/b4/b406783e/
Source: Royal Society of Chemistry journal article supplement (doi:10.1039/b406783e), 2004-01-01
Supplement: b406783e.doc [file b406783e.doc]

# Supplementary Material (ESI) for Chemical Communications

# This journal is © The Royal Society of Chemistry 2004

Satisfactory microanalyses have been obtained for procatalysts **1**-**4**.

Selected spectroscopic data.

NMR data For **1** 1H (CDCl3, 400 MHz) : 7.39 – 7.09 (3x m, 8H, arylH), 5.25 (m, 4H, CH2 of n-propyl), 4.93 (q, 2H, JHH 7.0 Hz, CH), 2.28 (s, 3H, MeCN), 1.91 (m, 4H, CH2 of n-propyl), 1.46 (d, 6H JHH 6.5 Hz, CH3), 1.36 (s, 36H, *t*Bu), 1.25 (s, 36H, *t*Bu), 1.01 (t, 6H, JHH 6.7 Hz, CH3 of n-propyl). 51V (CDCl3, 105.1 MHz, relative to VOCl3) : -410.3. IR: *v*(V=O) 999 cm-1. For **2** 1H (CDCl3, 400 MHz) : 7.18 – 6.76 (3x br m, 8H, arylH), 5.25 (br m, 4H, CH2 of n-propyl), 4.39 (br m, 2H, JHH 11.0 Hz, CH2), 3.31 (br m, 2H, JHH 11.0 Hz, CH2), 2.24 (s, 12H, Me), 1.93 (s, 3H, MeCN), 1.92 (bm, 4H, CH2 of n-propyl), 1.33 (s, 36H, *t*Bu), 0.98 (bm, 6H, CH3 of n-propyl). 51V (CDCl3, 105.1 MHz) : -459.7. IR: *v*(V=O) 994 cm-1. For **3** 1H (CDCl3, 400 MHz) Kinetic isomer : 7.28 – 6.19 (several m, 12H, arylH), 4.03 (bs, 4H, CH2), 3.99 (bs, 2H, CH2), 2.23 (s, 6H, Me), 2.19 (s, 6H, Me), 2.08 (bs, 6H. Me), 1.94 (s, 3H, MeCN), 1.44 (s, 18H, *t*Bu), 1.39 (s, 18H, *t*Bu). Thermodynamic isomer (CDCl3, 400 MHz) : 7.19 – 6.84 (several m, 12H, arylH), 4.32 (d, 4H, J 14.3, CH2), 3.44 (d, 4H, J 14.5, CH2), 2.28 (s, 9H, Me), 2.24(s, 3H, Me), 2.19 (s, 3H, Me), 2.12 (s, 3H, Me), 1.95 (s, 3H, MeCN), 1.45 (s, 9H, *t*Bu), 1.40 (s, 9H, *t*Bu), 1.34 (s, 18H, *t*Bu). IR: *v*(V=O) 1024 cm-1. For **4** 1H (C6D6, 400 MHz) Kinetic isomer : 7.28 – 6.19 (several m, 12H, arylH), 4.41 (bs, 2H, CH2), 4.12 (d, 2H, J 14.6, CH2), 4.04 (d, 2H, J 18.4, CH2), 2.86 (d, 2H, J 14.1, CH2), 1.59 (s, 6H, Me), 1.44 (s, 18H, *t*Bu), 1.31 (s, 18H, *t*Bu), 0.94 (s, 18H, *t*Bu), 0.91 (s, 18H, *t*Bu). Thermodynamic isomer (C6D6, 400 MHz) : 7.38 – 6.07 (several m, 12H, arylH), 5.16 (d, 2H, JHH 14.5 Hz, CH2), 3.49 (s, 4H, CH2), 3.15 (d, 2H, JHH 14.5 Hz, CH2), 1.11 (2x s, 18H, *t*Bu), 1.08 (s, 9H, *t*Bu), 1.00 (3x s, 27H, *t*Bu), 0.98 (2x s, 18H, *t*Bu). IR: *v*(V=O) 1013 cm-1.

Typical Synthesis: For **2:** To 2,2’-methylenebis(6-*tert*-butyl-4-methylphenol) (2.00g, 5.87mmol) in toluene (40 cm3) was added [VO(OnPr)3] (1.33 cm3, 5.87mmol). After refluxing for 12h, the volatiles were removed *in-vacuo* and the brown residue was extracted into warm MeCN (30 cm3). Prolonged standing at ambient temperature (1-2 days) afforded dark brown crystals. Yield 1.87g, *ca* 35%.

The same procedure was followed for **1**, **3** and **4** using the respective di and triphenol to afford crystalline samples in yields of *ca* 30, 40 and 39%, respectively.

For NMR of **3** and **4**, crystalline samples were dissolved up in C6D6 and the spectra recorded at 5 mins and at 48 hrs.

Polymerisation results with procatalyst **2**. (DMAC only)

Polymerisation results with reactivated procatalyst **2**. (DMAC + ETA)

Polymerisation results with reactivated procatalyst **3**. (DMAC + ETA)

Low cocatalyst polymerisation runs with reactivated procatalyst **3** at 55oC.

Polymerisation results with procatalyst **4** (DMAC only)

Activity VS Time for Procatalyst **2.**

| Run | Procatalyst amount (mmol) | [Al]/[V] | Time (min) | Temp(oC) | Activity  (g/mmolV.hr.bar) |
| --- | --- | --- | --- | --- | --- |
| 1 | 0.1 | 5000 | 1.5 | 25 | 25200 |
| 2 | 0.1 | 5000 | 5 | 25 | 22860 |
| 3 | 0.1 | 5000 | 10 | 25 | 23310 |
| 4 | 0.1 | 5000 | 15 | 25 | 19680 |
| 5 | 0.1 | 5000 | 20 | 25 | 17070 |

Activity VS Time for Procatalyst **3**.

| Run | Procatalyst amount (mmol) | [Al]/[V] | Time (min) | Temp(oC) | Activity  (g/mmolV.hr.bar) |
| --- | --- | --- | --- | --- | --- |
| 1 | 0.1 | 2500 | 1.5 | 25 | 36400 |
| 2 | 0.1 | 2500 | 7.5 | 25 | 20680 |
| 3 | 0.1 | 2500 | 9 | 25 | 21000 |
| 4 | 0.1 | 2500 | 15 | 25 | 14860 |
| 5 | 0.1 | 2500 | 25 | 25 | 16116 |
